# Supplementary material for: Quantum chemical evidence for the origin of the red/blue colors of Hydrangea macrophylla sepals
Source: Royal Society of Chemistry journal article supplement (doi:10.1039/c9nj00237e), 2019-01-01
Supplement: c9nj00237e1.pdf [file c9nj00237e1.pdf]

**Supplementary Information for:**

**Quantum Chemical Evidence for the Origin of the Red/Blue Colors of *Hydrangea macrophylla* Sepals**

Xue Li,<sup>1</sup> Farhan Siddique,<sup>1</sup> Gustavo T. Medeiros Silva,<sup>2</sup> Frank H. Quina,<sup>\*2</sup> Hans Lischka,<sup>1,3</sup> Adelia J. A. Aquino<sup>\*1,3,4</sup>

<sup>1</sup>School of Pharmaceutical Science and Technology, Tianjin University, Tianjin 300072, People's Republic of China

<sup>2</sup>Instituto de Química, Universidade de São Paulo, Av. Lineu Prestes 748, São Paulo, SP 05508-030, Brazil

<sup>3</sup>Department of Chemistry and Biochemistry, Texas Tech University, Lubbock, Texas 79409-1061, United States

<sup>4</sup>Institute for Soil Research, University of Natural Resources and Life Sciences Vienna, Peter-Jordan-Strasse 82, A-1190 Vienna, Austria

**Contents:**

pp. 3: Figure S1. MP2/def2-TZVP optimized geometries of the ground state of the methoxy analog (2), of the corresponding neutral binary complexes with Al(III) (2/Al).

pp. 3: Figure S2. B3-LYP/def2-TZVP optimized geometries of the ground states of two possible relative orientations of the copigment 3 in binary complexes with the methoxy ether analog of 3-O-glucosyl delphinidin (2).

pp. 4: Figure S3. The four different optimized structures using B3-LYP/def2-TZVP in gas phase for the ternary anthocyanin-Al(III)-copigment complexes, varying the diaquo ligand coordination to aluminum(III) (denoted cis and trans) and the orientation of the anthocyanin (methoxy ether analog of 3-O-glucosyl delphinidin) relative to the copigment.

pp. 5-7: Tables S1 and S2. Calculated TDDFT and ADC(2) in vacuum and COSMO water excitation energies  $\Delta E$ (in eV), and maximum wavelength  $\lambda_{\max}$  (in nm), and oscillator strength  $f$  for the different systems investigated in this work.

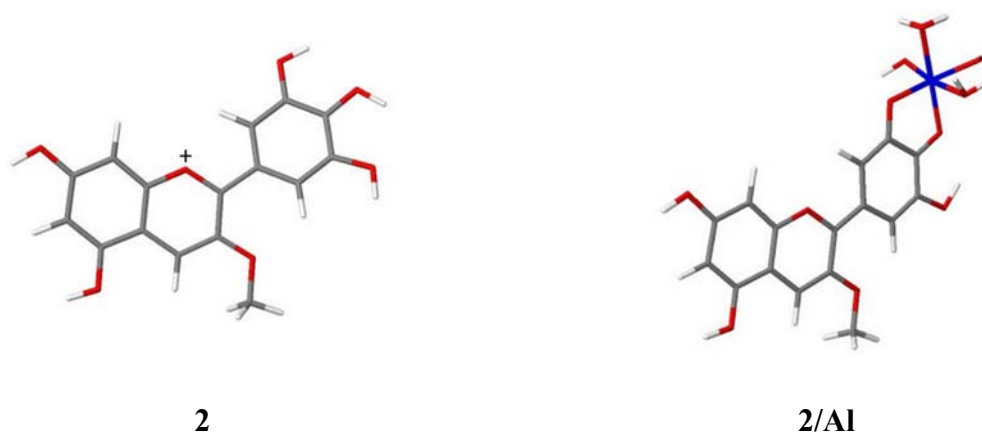

**Figure S1.** MP2/def2-TZVP optimized geometries of the ground state of the methoxy analog (**2**), and the corresponding neutral binary complexes with Al(III) (**2/Al**). Atom color scheme: blue = Al, red = O, white = H, and gray = C.

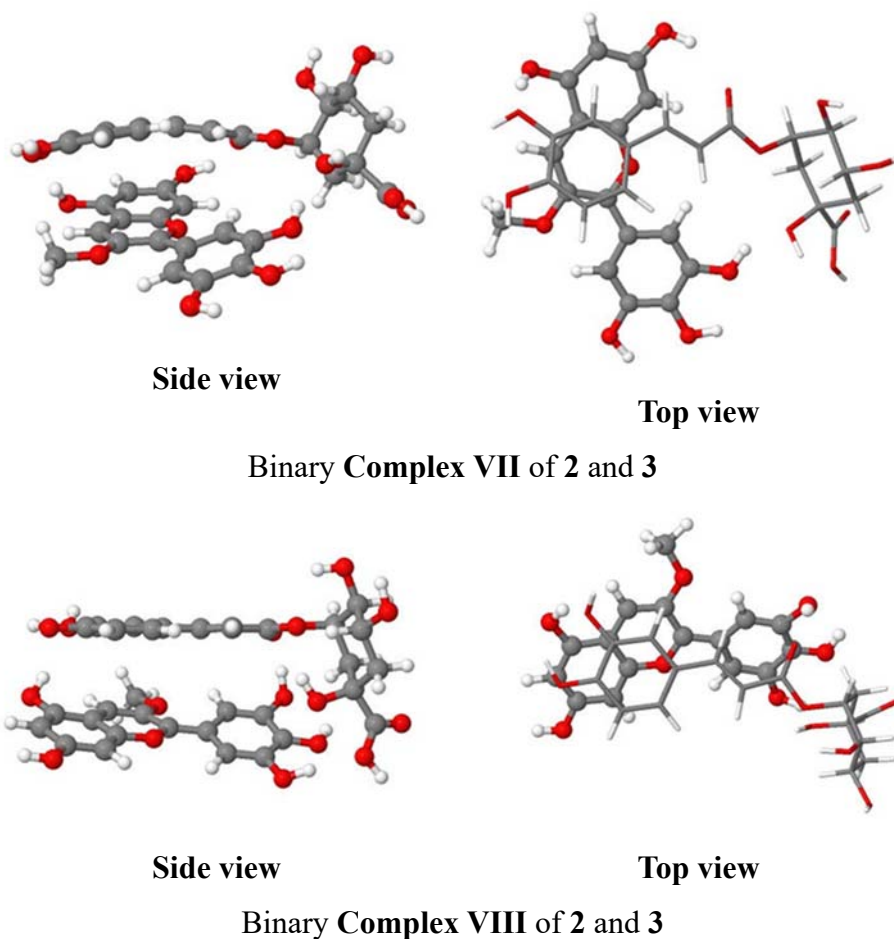

**Figure S2.** B3-LYP/def2-TZVP optimized geometries of the ground states of two possible relative orientations of the copigment 3 in binary complexes with the methoxy ether analog of 3-O-glucosyl delphinidin (**2**). Atom color scheme: red = O, white = H, and gray = C;

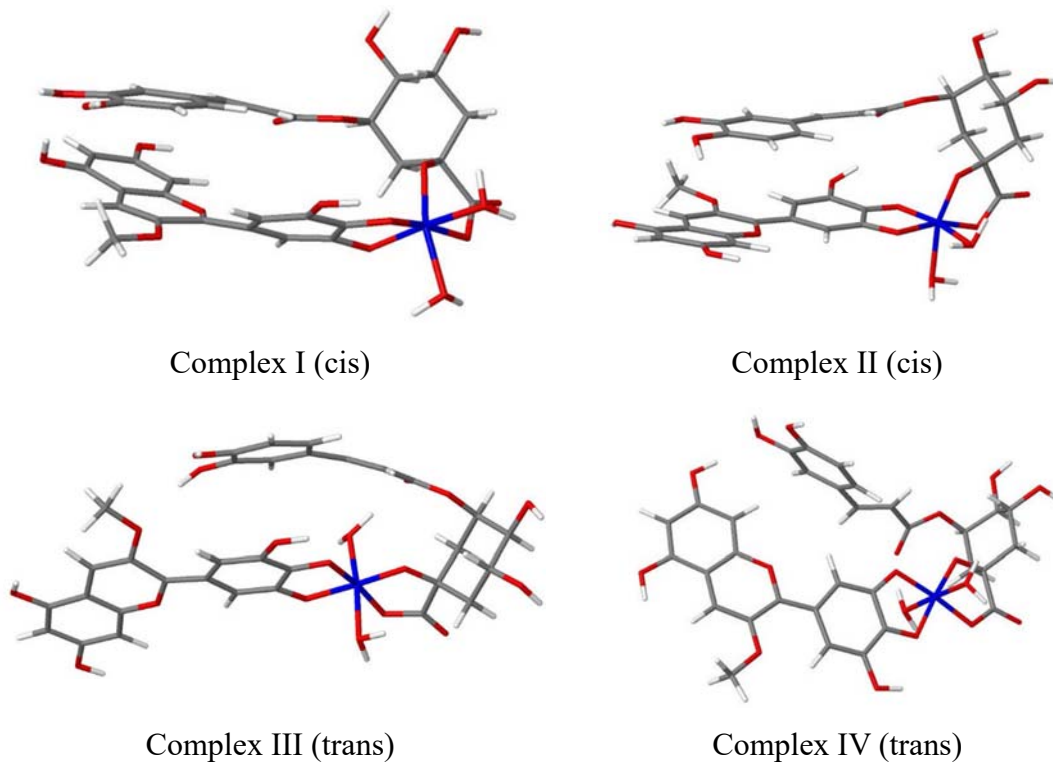

**Figure S3.** The four different optimized structures using B3-LYP/def2-TZVP in gas phase for the ternary anthocyanin-Al(III)-copigment complexes, varying the diaquo ligand coordination to aluminum(III) (denoted cis and trans) and the orientation of the anthocyanin (methoxy ether analog of 3-O-glucosyl delphinidin) relative to the copigment. Atom color scheme: blue = Al, red = O, white = H, and gray = C.

**Table S1.** Calculated TDDFT and ADC(2) (in vacuum and COSMO water) excitation energies  $\Delta E$ (in eV), and maximum wavelength  $\lambda_{\max}$  (in nm) and oscillator strength  $f$  of the delphinidin cations **1** and **2**, of the corresponding neutral binary delphinidin-Al complexes(**1/Al** and **2/Al**) and of the copigment **3**.

| system                                                  | state           | TDDFT                  |      |                        |      | ADC(2)                 |      |                        |      |
|---------------------------------------------------------|-----------------|------------------------|------|------------------------|------|------------------------|------|------------------------|------|
|                                                         |                 | Vacuum                 |      | Water                  |      | Vacuum                 |      | Water                  |      |
|                                                         |                 | $\Delta E$<br>(eV, nm) | $f$  |
| 3-O-glucosyl delphinidin ( <b>1</b> )                   | S <sub>1</sub>  | 2.39, 519              | 0.07 | 2.54, 488              | 0.52 | 2.27, 547              | 0.52 | 2.44, 509              | 0.58 |
|                                                         | S <sub>2</sub>  | 2.55, 485              | 0.41 | 2.62, 473              | 0.06 | 2.67, 464              | 0.03 | 2.89, 429              | 0.03 |
|                                                         | S <sub>3</sub>  | 2.69, 462              | 0.01 | 2.86, 433              | 0.06 | 2.85, 436              | 0.01 | 3.11, 398              | 0.02 |
|                                                         | S <sub>4</sub>  | 2.83, 439              | 0.03 | 3.55, 350              | 0.00 | 3.56, 348              | 0.08 | 3.75, 331              | 0.08 |
|                                                         | S <sub>5</sub>  | 2.91, 426              | 0.00 | 3.62, 343              | 0.08 | 3.61, 343              | 0.00 | 4.30, 288              | 0.00 |
|                                                         | S <sub>6</sub>  | 3.23, 384              | 0.00 | 3.85, 322              | 0.00 | 4.00, 310              | 0.01 | 4.62, 268              | 0.02 |
|                                                         | S <sub>7</sub>  | 3.35, 370              | 0.00 | 4.23, 293              | 0.00 | 4.40, 282              | 0.00 | 4.73, 262              | 0.32 |
|                                                         | S <sub>8</sub>  | 3.55, 349              | 0.08 | 4.28, 289              | 0.02 | 4.54, 273              | 0.05 | 4.92, 252              | 0.24 |
|                                                         | S <sub>9</sub>  | 3.92, 316              | 0.00 | 4.30, 288              | 0.11 | 4.60, 270              | 0.10 | 5.05, 246              | 0.02 |
|                                                         | S <sub>10</sub> | 4.17, 297              | 0.12 | 4.47, 277              | 0.05 | 4.65, 267              | 0.00 | 5.26, 236              | 0.04 |
| 3-O-methyl delphinidin ( <b>2</b> )                     | S <sub>1</sub>  | 2.49, 497              | 0.07 | 2.50, 497              | 0.53 | 2.30, 539              | 0.62 | 2.38, 521              | 0.58 |
|                                                         | S <sub>2</sub>  | 2.56, 484              | 0.43 | 2.75, 451              | 0.01 | 2.76, 450              | 0.01 | 3.04, 408              | 0.10 |
|                                                         | S <sub>3</sub>  | 2.91, 426              | 0.14 | 2.94, 422              | 0.24 | 2.92, 425              | 0.02 | 3.19, 388              | 0.02 |
|                                                         | S <sub>4</sub>  | 3.66, 339              | 0.04 | 3.66, 339              | 0.03 | 3.82, 324              | 0.03 | 3.86, 321              | 0.03 |
|                                                         | S <sub>5</sub>  | 4.29, 289              | 0.04 | 4.33, 286              | 0.01 | 4.55, 272              | 0.04 | 4.52, 274              | 0.01 |
|                                                         | S <sub>6</sub>  | 4.47, 277              | 0.04 | 4.52, 274              | 0.16 | 4.75, 261              | 0.25 | 4.74, 262              | 0.45 |
|                                                         | S <sub>7</sub>  | 4.55, 273              | 0.06 | 4.77, 260              | 0.01 | 4.98, 249              | 0.18 | 5.17, 240              | 0.10 |
|                                                         | S <sub>8</sub>  | 4.74, 262              | 0.13 | 4.78, 260              | 0.24 | 5.07, 245              | 0.02 | 5.22, 237              | 0.01 |
|                                                         | S <sub>9</sub>  | 5.11, 243              | 0.25 | 5.15, 241              | 0.22 | 5.32, 233              | 0.15 | 5.48, 226              | 0.11 |
|                                                         | S <sub>10</sub> | 5.16, 240              | 0.06 | 5.19, 239              | 0.05 | 5.62, 221              | 0.27 | 5.63, 220              | 0.02 |
| 3-O-glucosyl Delphinidin-Aluminum (III) ( <b>1/Al</b> ) | S <sub>1</sub>  | 2.04, 608              | 0.10 | 2.34, 529              | 0.51 | 1.92, 646              | 0.35 | 2.01, 616              | 0.77 |
|                                                         | S <sub>2</sub>  | 2.55, 486              | 0.65 | 2.59, 478              | 0.42 | 2.45, 506              | 0.51 | 2.68, 462              | 0.07 |
|                                                         | S <sub>3</sub>  | 3.22, 385              | 0.00 | 3.02, 411              | 0.01 | 3.58, 347              | 0.06 | 3.19, 389              | 0.02 |
|                                                         | S <sub>4</sub>  | 3.24, 383              | 0.07 | 3.64, 341              | 0.05 | 3.64, 341              | 0.03 | 3.94, 315              | 0.05 |
|                                                         | S <sub>5</sub>  | 3.34, 372              | 0.01 | 3.86, 322              | 0.06 | 3.67, 338              | 0.04 | 4.12, 301              | 0.05 |
|                                                         | S <sub>6</sub>  | 3.51, 353              | 0.00 | 3.88, 320              | 0.00 | 4.03, 308              | 0.00 | 4.38, 283              | 0.00 |
|                                                         | S <sub>7</sub>  | 3.60, 344              | 0.01 | 4.14, 300              | 0.00 | 4.15, 299              | 0.02 | 4.72, 263              | 0.05 |
|                                                         | S <sub>8</sub>  | 3.91, 317              | 0.08 | 4.22, 294              | 0.00 | 4.33, 286              | 0.00 | 4.73, 262              | 0.01 |
|                                                         | S <sub>9</sub>  | 3.97, 312              | 0.02 | 4.25, 292              | 0.00 | 4.46, 278              | 0.11 | 4.75, 261              | 0.10 |
|                                                         | S <sub>10</sub> | 4.02, 308              | 0.05 | 4.29, 289              | 0.00 | 4.54, 273              | 0.01 | 4.97, 250              | 0.06 |
| 3-O-methyl Delphinidin-Aluminum (III) ( <b>2/Al</b> )   | S <sub>1</sub>  | 2.10, 590              | 0.10 | 2.37, 523              | 0.59 | 1.94, 640              | 0.36 | 1.96, 632              | 0.76 |
|                                                         | S <sub>2</sub>  | 2.62, 473              | 0.75 | 2.59, 480              | 0.34 | 2.45, 507              | 0.56 | 2.63, 471              | 0.08 |
|                                                         | S <sub>3</sub>  | 3.23, 384              | 0.00 | 2.98, 417              | 0.07 | 3.56, 349              | 0.07 | 3.10, 400              | 0.01 |
|                                                         | S <sub>4</sub>  | 3.33, 373              | 0.00 | 3.68, 337              | 0.02 | 3.71, 334              | 0.00 | 3.92, 317              | 0.04 |
|                                                         | S <sub>5</sub>  | 3.44, 361              | 0.04 | 3.96, 313              | 0.05 | 3.77, 329              | 0.02 | 4.31, 288              | 0.05 |
|                                                         | S <sub>6</sub>  | 3.68, 337              | 0.01 | 4.16, 298              | 0.00 | 4.12, 301              | 0.00 | 4.40, 282              | 0.00 |
|                                                         | S <sub>7</sub>  | 3.82, 325              | 0.00 | 4.29, 289              | 0.00 | 4.19, 296              | 0.02 | 4.71, 263              | 0.09 |
|                                                         | S <sub>8</sub>  | 3.95, 314              | 0.02 | 4.40, 282              | 0.00 | 4.44, 279              | 0.01 | 4.80, 258              | 0.00 |
|                                                         | S <sub>9</sub>  | 4.05, 306              | 0.01 | 4.46, 278              | 0.01 | 4.53, 274              | 0.02 | 4.89, 254              | 0.09 |
|                                                         | S <sub>10</sub> | 4.15, 299              | 0.06 | 4.55, 273              | 0.02 | 4.65, 267              | 0.07 | 5.07, 245              | 0.02 |
| Copigment: 5-O-caffeoyl quinic acid ( <b>3</b> )        | S <sub>1</sub>  | 3.31, 375              | 0.06 | 3.69, 336              | 0.47 | 4.31, 288              | 0.41 | 4.15, 299              | 0.60 |
|                                                         | S <sub>2</sub>  | 3.33, 372              | 0.13 | 4.27, 291              | 0.32 | 4.62, 268              | 0.21 | 4.56, 272              | 0.13 |
|                                                         | S <sub>3</sub>  | 3.80, 326              | 0.00 | 4.78, 259              | 0.00 | 4.72, 263              | 0.01 | 4.93, 251              | 0.00 |
|                                                         | S <sub>4</sub>  | 3.90, 318              | 0.00 | 4.92, 252              | 0.00 | 5.61, 221              | 0.79 | 5.52, 225              | 0.69 |
|                                                         | S <sub>5</sub>  | 3.92, 316              | 0.01 | 5.09, 244              | 0.40 | 5.89, 210              | 0.00 | 5.97, 208              | 0.00 |
|                                                         | S <sub>6</sub>  | 4.00, 310              | 0.36 | 5.17, 240              | 0.00 | 6.01, 206              | 0.00 | 6.23, 199              | 0.06 |
|                                                         | S <sub>7</sub>  | 4.18, 297              | 0.00 | 5.36, 231              | 0.00 | 6.22, 199              | 0.06 | 6.25, 198              | 0.10 |
|                                                         | S <sub>8</sub>  | 4.39, 282              | 0.01 | 5.63, 220              | 0.08 | 6.38, 194              | 0.11 | 6.53, 190              | 0.05 |
|                                                         | S <sub>9</sub>  | 4.46, 278              | 0.00 | 5.71, 217              | 0.01 | 6.55, 189              | 0.01 | 6.57, 189              | 0.00 |
|                                                         | S <sub>10</sub> | 4.58, 271              | 0.02 | 5.79, 214              | 0.01 | 6.63, 187              | 0.01 | 6.87, 181              | 0.20 |

**Table S2.** Calculated TDDFT (in vacuum) and ADC(2) (in vacuum and in water) excitation energies  $\Delta E$ (in eV), and maximum wavelength  $\lambda_{\max}$  (in nm) and oscillator strength  $f$  of the binary complexes of the delphinidin cations **1** and **2** with the copigment **3** without aluminum and of the neutral ternary complexes **1/Al/3** and **2/Al(III)/3**.

| system                                                                | state           | TDDFT                  |      |                        |      | ADC(2)                 |      |                        |      |
|-----------------------------------------------------------------------|-----------------|------------------------|------|------------------------|------|------------------------|------|------------------------|------|
|                                                                       |                 | Vacuum                 |      | Water                  |      | Vacuum                 |      | Water                  |      |
|                                                                       |                 | $\Delta E$<br>(eV, nm) | $f$  |
| Binary Copigment Complex V of <b>1</b> and <b>3</b> without Al        | S <sub>1</sub>  | 2.29, 542              | 0.03 | 2.19, 566              | 0.02 | 2.30, 540              | 0.41 | 2.35, 528              | 0.47 |
|                                                                       | S <sub>2</sub>  | 2.55, 487              | 0.06 | 2.55, 486              | 0.39 | 2.71, 457              | 0.01 | 2.82, 439              | 0.02 |
|                                                                       | S <sub>3</sub>  | 2.59, 479              | 0.26 | 2.59, 478              | 0.06 | 2.79, 444              | 0.00 | 2.85, 435              | 0.01 |
|                                                                       | S <sub>4</sub>  | 2.82, 439              | 0.06 | 2.83, 438              | 0.05 | 2.91, 427              | 0.01 | 2.91, 427              | 0.00 |
|                                                                       | S <sub>5</sub>  | 3.05, 407              | 0.00 | 3.10, 399              | 0.00 | 3.55, 349              | 0.05 | 3.65, 340              | 0.03 |
|                                                                       | S <sub>6</sub>  | 3.15, 394              | 0.00 | 3.31, 375              | 0.00 | 3.81, 325              | 0.00 | 3.80, 327              | 0.00 |
|                                                                       | S <sub>7</sub>  | 3.38, 367              | 0.02 | 3.40, 365              | 0.05 | 3.94, 315              | 0.00 | 3.87, 320              | 0.44 |
|                                                                       | S <sub>8</sub>  | 3.46, 358              | 0.00 | 3.59, 346              | 0.19 | 4.03, 308              | 0.33 | 4.03, 308              | 0.02 |
|                                                                       | S <sub>9</sub>  | 3.51, 354              | 0.00 | 3.65, 339              | 0.05 | 4.31, 288              | 0.02 | 4.33, 286              | 0.01 |
|                                                                       | S <sub>10</sub> | 3.60, 344              | 0.01 | 3.72, 333              | 0.08 | 4.33, 286              | 0.02 | 4.48, 277              | 0.17 |
| Binary Copigment Complex VI of <b>1</b> and <b>3</b> without Al       | S <sub>1</sub>  | 2.30, 538              | 0.01 | 2.26, 550              | 0.02 | 2.02, 615              | 0.50 | 2.27, 547              | 0.52 |
|                                                                       | S <sub>2</sub>  | 2.46, 505              | 0.12 | 2.50, 496              | 0.52 | 2.45, 506              | 0.01 | 2.73, 454              | 0.03 |
|                                                                       | S <sub>3</sub>  | 2.48, 499              | 0.34 | 2.61, 475              | 0.00 | 2.79, 445              | 0.01 | 2.84, 437              | 0.01 |
|                                                                       | S <sub>4</sub>  | 2.88, 430              | 0.00 | 2.85, 435              | 0.04 | 3.07, 404              | 0.01 | 2.94, 422              | 0.01 |
|                                                                       | S <sub>5</sub>  | 3.18, 390              | 0.01 | 3.20, 388              | 0.04 | 3.64, 341              | 0.07 | 3.68, 337              | 0.08 |
|                                                                       | S <sub>6</sub>  | 3.20, 388              | 0.00 | 3.39, 366              | 0.02 | 4.19, 296              | 0.27 | 3.68, 337              | 0.06 |
|                                                                       | S <sub>7</sub>  | 3.29, 377              | 0.00 | 3.46, 358              | 0.00 | 4.22, 294              | 0.02 | 3.93, 316              | 0.62 |
|                                                                       | S <sub>8</sub>  | 3.46, 358              | 0.04 | 3.62, 343              | 0.01 | 4.23, 293              | 0.08 | 4.01, 309              | 0.00 |
|                                                                       | S <sub>9</sub>  | 3.52, 352              | 0.01 | 3.70, 335              | 0.53 | 4.27, 290              | 0.33 | 4.45, 279              | 0.03 |
|                                                                       | S <sub>10</sub> | 3.61, 343              | 0.04 | 3.77, 329              | 0.00 | 4.29, 289              | 0.01 | 4.50, 276              | 0.01 |
| Binary Copigment Complex VII of <b>2</b> and <b>3</b> without Al      | S <sub>1</sub>  | 2.36, 526              | 0.05 | 2.27, 545              | 0.03 | 2.38, 521              | 0.39 | 2.41, 515              | 0.44 |
|                                                                       | S <sub>2</sub>  | 2.48, 501              | 0.25 | 2.48, 501              | 0.44 | 2.75, 451              | 0.05 | 2.81, 442              | 0.06 |
|                                                                       | S <sub>3</sub>  | 2.57, 483              | 0.04 | 2.66, 466              | 0.01 | 2.85, 436              | 0.03 | 2.99, 415              | 0.02 |
|                                                                       | S <sub>4</sub>  | 2.86, 434              | 0.16 | 2.88, 430              | 0.14 | 3.17, 391              | 0.05 | 3.31, 374              | 0.06 |
|                                                                       | S <sub>5</sub>  | 3.19, 388              | 0.00 | 3.13, 396              | 0.00 | 3.52, 353              | 0.01 | 3.53, 352              | 0.01 |
|                                                                       | S <sub>6</sub>  | 3.46, 359              | 0.01 | 3.46, 359              | 0.01 | 3.76, 330              | 0.02 | 3.89, 319              | 0.02 |
|                                                                       | S <sub>7</sub>  | 3.46, 358              | 0.00 | 3.63, 341              | 0.02 | 4.13, 300              | 0.00 | 4.15, 299              | 0.36 |
|                                                                       | S <sub>8</sub>  | 3.56, 349              | 0.02 | 3.77, 329              | 0.35 | 4.34, 286              | 0.20 | 4.45, 279              | 0.05 |
|                                                                       | S <sub>9</sub>  | 3.81, 325              | 0.00 | 3.81, 326              | 0.00 | 4.50, 275              | 0.03 | 4.51, 275              | 0.05 |
|                                                                       | S <sub>10</sub> | 3.92, 317              | 0.00 | 4.00, 310              | 0.04 | 4.54, 273              | 0.01 | 4.54, 273              | 0.05 |
| Binary Copigment Complex VIII of <b>2</b> and <b>3</b> without Al     | S <sub>1</sub>  | 2.26, 549              | 0.09 | 2.20, 564              | 0.05 | 2.11, 588              | 0.33 | 2.26, 550              | 0.41 |
|                                                                       | S <sub>2</sub>  | 2.45, 507              | 0.07 | 2.51, 493              | 0.35 | 2.59, 478              | 0.01 | 2.88, 430              | 0.08 |
|                                                                       | S <sub>3</sub>  | 2.58, 480              | 0.22 | 2.79, 444              | 0.02 | 2.70, 459              | 0.09 | 2.92, 425              | 0.08 |
|                                                                       | S <sub>4</sub>  | 2.87, 433              | 0.08 | 2.93, 424              | 0.11 | 2.85, 435              | 0.07 | 3.16, 393              | 0.01 |
|                                                                       | S <sub>5</sub>  | 3.01, 411              | 0.00 | 3.17, 391              | 0.03 | 3.51, 354              | 0.04 | 3.73, 333              | 0.04 |
|                                                                       | S <sub>6</sub>  | 3.24, 383              | 0.04 | 3.36, 370              | 0.11 | 3.69, 336              | 0.01 | 3.87, 320              | 0.53 |
|                                                                       | S <sub>7</sub>  | 3.36, 369              | 0.01 | 3.64, 341              | 0.02 | 3.70, 335              | 0.01 | 3.89, 319              | 0.18 |
|                                                                       | S <sub>8</sub>  | 3.52, 352              | 0.00 | 3.72, 333              | 0.63 | 4.00, 310              | 0.00 | 4.40, 282              | 0.01 |
|                                                                       | S <sub>9</sub>  | 3.58, 346              | 0.02 | 3.78, 328              | 0.00 | 4.13, 300              | 0.53 | 4.47, 278              | 0.00 |
|                                                                       | S <sub>10</sub> | 3.68, 337              | 0.02 | 3.94, 315              | 0.00 | 4.31, 288              | 0.00 | 4.55, 272              | 0.08 |
| Ternary <b>1/Al/3</b> <i>trans</i> -diaquo Aluminum Complex <b>IV</b> | S <sub>1</sub>  | 2.06, 603              | 0.06 | 2.30, 539              | 0.37 | 1.99, 623              | 0.36 | 1.97, 631              | 0.64 |
|                                                                       | S <sub>2</sub>  | 2.43, 511              | 0.00 | 2.56, 484              | 0.35 | 2.40, 516              | 0.39 | 2.60, 477              | 0.11 |
|                                                                       | S <sub>3</sub>  | 2.47, 499              | 0.04 | 2.59, 478              | 0.07 | 3.49, 355              | 0.00 | 3.18, 390              | 0.02 |
|                                                                       | S <sub>4</sub>  | 2.51, 493              | 0.52 | 3.03, 410              | 0.00 | 3.56, 348              | 0.02 | 3.64, 340              | 0.00 |
|                                                                       | S <sub>5</sub>  | 3.12, 398              | 0.00 | 3.05, 407              | 0.00 | 3.59, 345              | 0.08 | 3.92, 317              | 0.05 |
|                                                                       | S <sub>6</sub>  | 3.18, 390              | 0.00 | 3.30, 375              | 0.00 | 3.65, 340              | 0.02 | 4.04, 307              | 0.05 |
|                                                                       | S <sub>7</sub>  | 3.19, 389              | 0.00 | 3.35, 370              | 0.00 | 3.84, 323              | 0.00 | 4.17, 297              | 0.00 |
|                                                                       | S <sub>8</sub>  | 3.27, 379              | 0.07 | 3.61, 343              | 0.01 | 4.03, 307              | 0.00 | 4.23, 293              | 0.26 |
|                                                                       | S <sub>9</sub>  | 3.36, 369              | 0.02 | 3.63, 342              | 0.02 | 4.13, 300              | 0.02 | 4.26, 291              | 0.19 |
|                                                                       | S <sub>10</sub> | 3.69, 336              | 0.00 | 3.73, 333              | 0.40 | 4.24, 292              | 0.00 | 4.33, 287              | 0.00 |

|                                                                                       |                 |           |      |           |      |           |      |           |      |
|---------------------------------------------------------------------------------------|-----------------|-----------|------|-----------|------|-----------|------|-----------|------|
| Ternary<br><b>1/Al/3</b> <i>cis</i> -<br>diaquo<br>Aluminum<br>Complex<br><b>II</b>   | S <sub>1</sub>  | 2.17, 572 | 0.23 | 2.22, 559 | 0.33 | 1.95, 638 | 0.48 | 1.93, 644 | 0.55 |
|                                                                                       | S <sub>2</sub>  | 2.20, 563 | 0.02 | 2.49, 498 | 0.06 | 2.48, 500 | 0.09 | 2.72, 456 | 0.05 |
|                                                                                       | S <sub>3</sub>  | 2.39, 519 | 0.02 | 2.73, 454 | 0.24 | 2.94, 421 | 0.00 | 3.12, 397 | 0.09 |
|                                                                                       | S <sub>4</sub>  | 2.69, 461 | 0.24 | 3.04, 407 | 0.04 | 3.29, 377 | 0.10 | 3.24, 383 | 0.03 |
|                                                                                       | S <sub>5</sub>  | 2.99, 415 | 0.02 | 3.08, 402 | 0.10 | 3.48, 357 | 0.07 | 3.80, 327 | 0.06 |
|                                                                                       | S <sub>6</sub>  | 3.10, 400 | 0.04 | 3.13, 396 | 0.01 | 3.52, 352 | 0.02 | 3.88, 319 | 0.02 |
|                                                                                       | S <sub>7</sub>  | 3.17, 391 | 0.00 | 3.21, 387 | 0.01 | 3.59, 346 | 0.01 | 3.89, 319 | 0.01 |
|                                                                                       | S <sub>8</sub>  | 3.30, 376 | 0.06 | 3.59, 346 | 0.05 | 3.93, 316 | 0.00 | 3.98, 312 | 0.00 |
|                                                                                       | S <sub>9</sub>  | 3.39, 365 | 0.07 | 3.64, 341 | 0.00 | 3.96, 314 | 0.02 | 4.03, 308 | 0.21 |
|                                                                                       | S <sub>10</sub> | 3.40, 364 | 0.00 | 3.70, 335 | 0.02 | 4.01, 309 | 0.02 | 4.13, 300 | 0.00 |
| Ternary<br><b>2/Al/3</b> <i>trans</i> -<br>diaquo<br>Aluminum<br>Complex<br><b>IV</b> | S <sub>1</sub>  | 2.18, 568 | 0.10 | 2.32, 535 | 0.46 | 2.02, 613 | 0.49 | 1.97, 631 | 0.67 |
|                                                                                       | S <sub>2</sub>  | 2.51, 494 | 0.37 | 2.55, 486 | 0.33 | 2.43, 511 | 0.29 | 2.60, 477 | 0.10 |
|                                                                                       | S <sub>3</sub>  | 2.53, 490 | 0.20 | 2.75, 451 | 0.00 | 3.26, 380 | 0.02 | 3.10, 400 | 0.01 |
|                                                                                       | S <sub>4</sub>  | 2.86, 433 | 0.00 | 2.98, 416 | 0.03 | 3.54, 350 | 0.00 | 3.82, 325 | 0.01 |
|                                                                                       | S <sub>5</sub>  | 3.04, 408 | 0.00 | 3.08, 403 | 0.00 | 3.85, 322 | 0.02 | 3.85, 322 | 0.03 |
|                                                                                       | S <sub>6</sub>  | 3.09, 401 | 0.00 | 3.35, 370 | 0.00 | 3.89, 319 | 0.01 | 4.16, 298 | 0.00 |
|                                                                                       | S <sub>7</sub>  | 3.21, 387 | 0.00 | 3.53, 352 | 0.00 | 3.94, 314 | 0.05 | 4.21, 295 | 0.05 |
|                                                                                       | S <sub>8</sub>  | 3.54, 351 | 0.03 | 3.62, 342 | 0.02 | 3.96, 314 | 0.01 | 4.31, 288 | 0.01 |
|                                                                                       | S <sub>9</sub>  | 3.65, 340 | 0.01 | 3.68, 337 | 0.00 | 4.09, 303 | 0.00 | 4.37, 284 | 0.00 |
|                                                                                       | S <sub>10</sub> | 3.66, 339 | 0.00 | 3.77, 329 | 0.00 | 4.30, 288 | 0.00 | 4.45, 279 | 0.43 |
| Ternary<br><b>2/Al/3</b> <i>cis</i> -<br>diaquo<br>Aluminum<br>Complex<br><b>II</b>   | S <sub>1</sub>  | 2.20, 563 | 0.01 | 2.31, 538 | 0.45 | 2.16, 575 | 0.61 | 2.01, 617 | 0.68 |
|                                                                                       | S <sub>2</sub>  | 2.26, 550 | 0.02 | 2.45, 507 | 0.04 | 2.42, 512 | 0.09 | 2.65, 469 | 0.02 |
|                                                                                       | S <sub>3</sub>  | 2.27, 547 | 0.23 | 2.67, 465 | 0.20 | 3.02, 411 | 0.00 | 3.09, 401 | 0.00 |
|                                                                                       | S <sub>4</sub>  | 2.57, 482 | 0.33 | 2.95, 420 | 0.03 | 3.20, 388 | 0.04 | 3.23, 384 | 0.05 |
|                                                                                       | S <sub>5</sub>  | 2.97, 417 | 0.02 | 3.00, 413 | 0.05 | 3.44, 361 | 0.05 | 3.80, 326 | 0.02 |
|                                                                                       | S <sub>6</sub>  | 3.15, 394 | 0.04 | 3.21, 387 | 0.01 | 3.62, 343 | 0.00 | 3.87, 320 | 0.10 |
|                                                                                       | S <sub>7</sub>  | 3.19, 389 | 0.02 | 3.25, 382 | 0.02 | 3.80, 327 | 0.02 | 4.00, 310 | 0.00 |
|                                                                                       | S <sub>8</sub>  | 3.25, 381 | 0.00 | 3.62, 343 | 0.05 | 4.00, 310 | 0.02 | 4.14, 300 | 0.00 |
|                                                                                       | S <sub>9</sub>  | 3.39, 366 | 0.00 | 3.64, 340 | 0.01 | 4.10, 303 | 0.00 | 4.19, 296 | 0.05 |
|                                                                                       | S <sub>10</sub> | 3.47, 357 | 0.04 | 3.76, 330 | 0.00 | 4.11, 302 | 0.08 | 4.23, 293 | 0.34 |
